# Supplementary figures and images for: Anticancer compound ABT-263 accelerates apoptosis in virus-infected cells and imbalances cytokine production and lowers survival rates of infected mice
Source: PubMed Central journal article supplement — Cell Death Dis. 2013 Jul 25;4(7):e742–. doi: 10.1038/cddis.2013.267 (PMC3730437; doi:10.1038/cddis.2013.267), 2013-07-25

Supplemental Figure 2

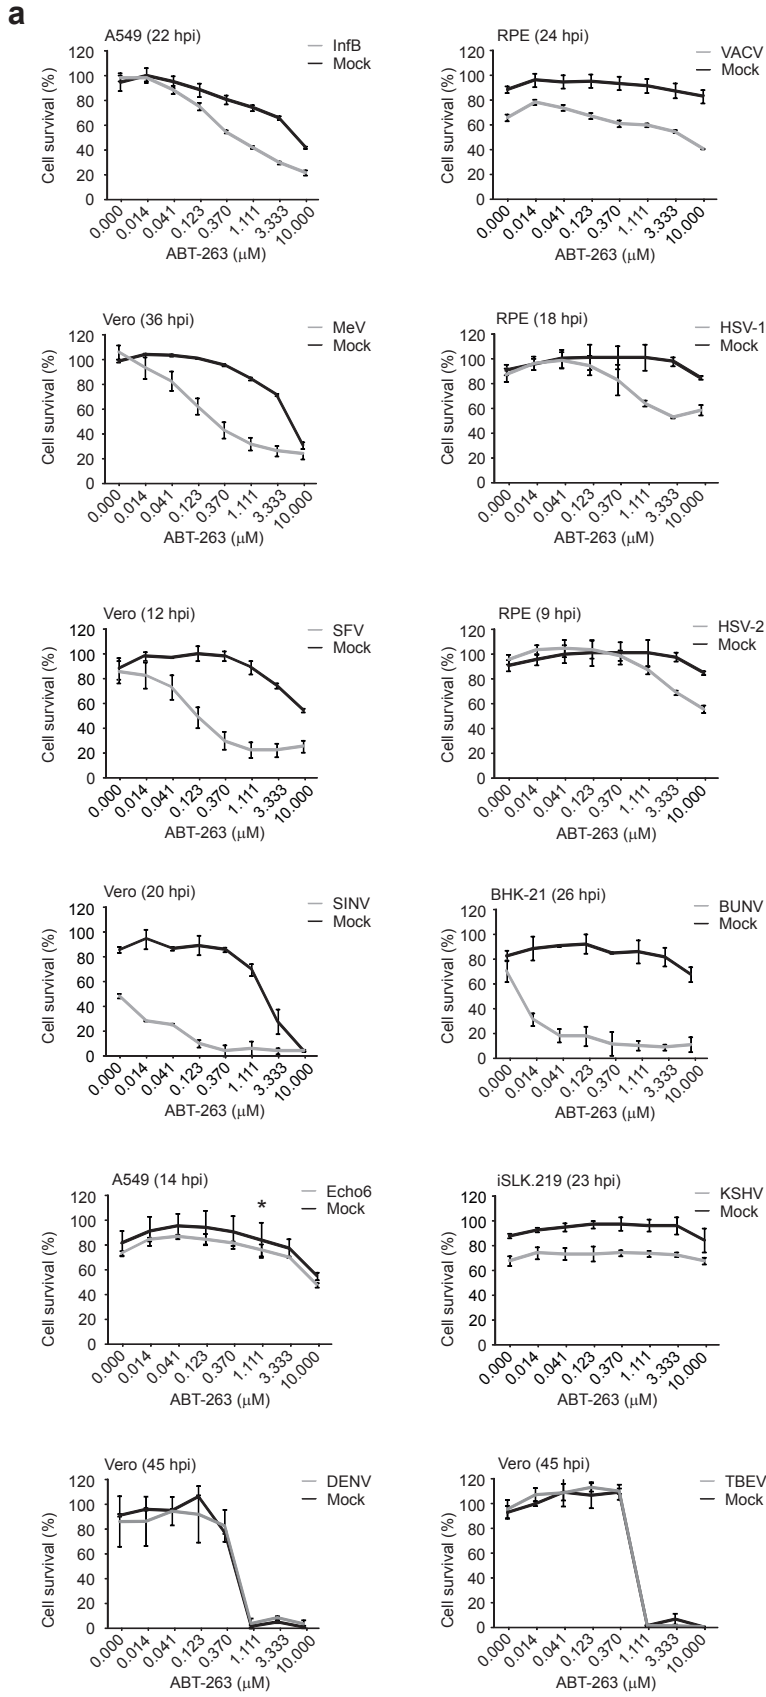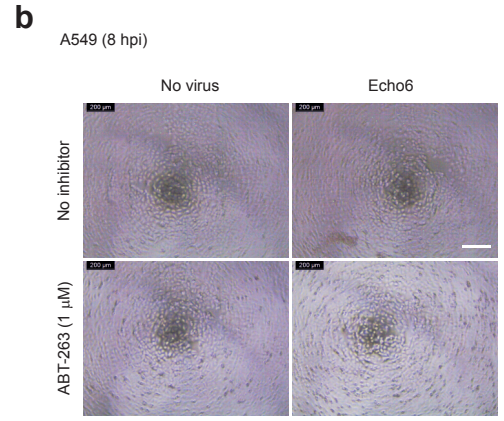

**a**

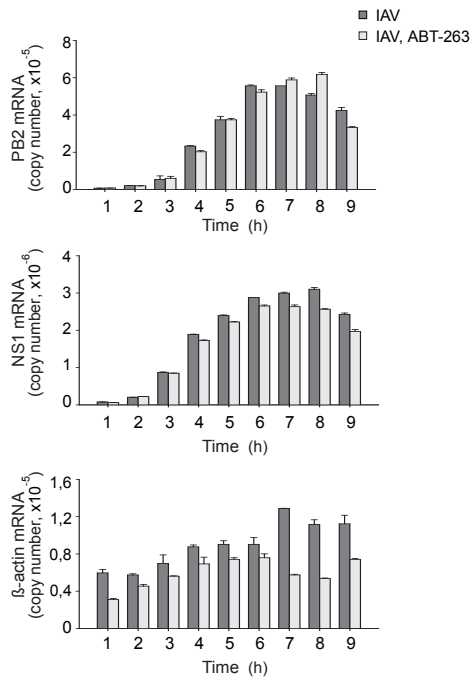

**b**

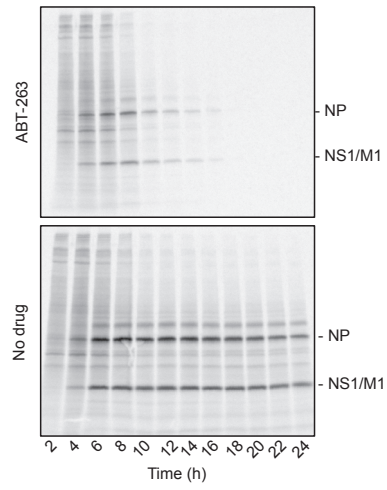

**c**

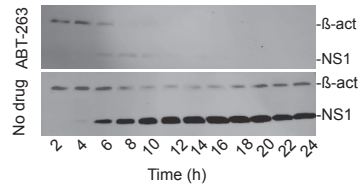

**d**

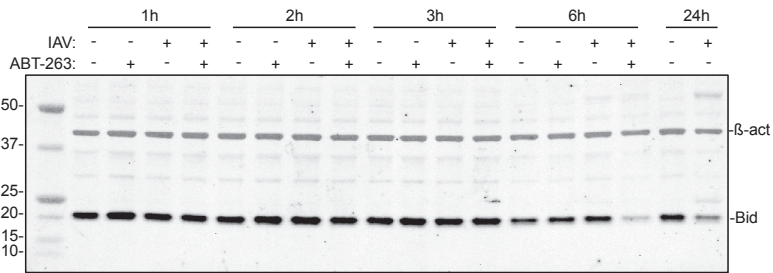

**e**

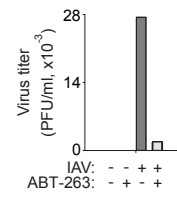

Supplemental Figure 4

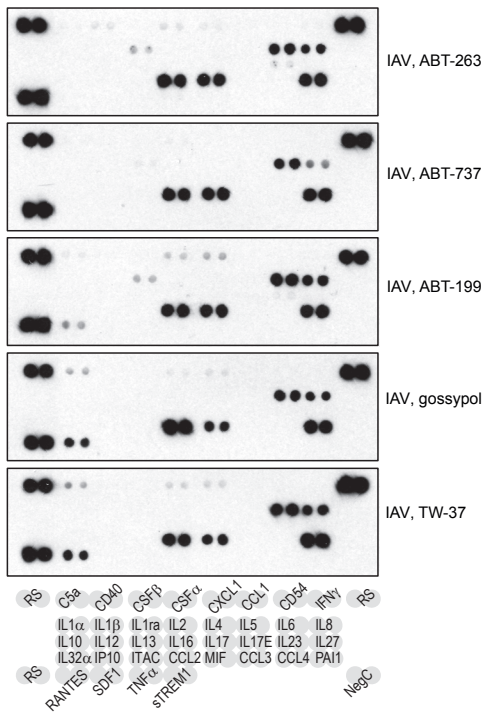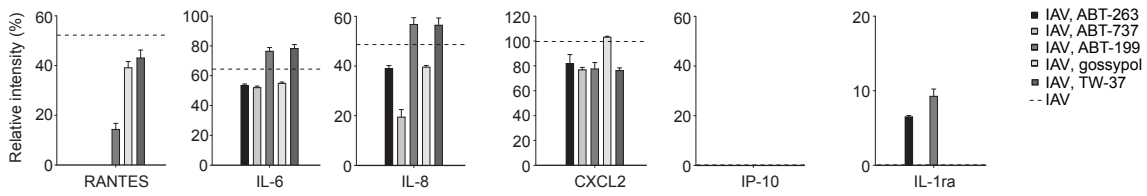

Supplement: cddis2013267x1.pdf [file cddis2013267x1.pdf]
